# Supplementary material for: Development of a charge-perturbed particle-in-a-sphere model for nanoparticle electronic structure
Source: Royal Society of Chemistry journal article supplement (doi:10.1039/c2cp23889f), 2012-01-01
Supplement: c2cp23889f.pdf [file c2cp23889f.pdf]

## Supporting Information

for

### **Development of a charge-perturbed particle-in-a-sphere model for nanoparticle electronic structure**

Emilie B. Guidez and Christine M. Aikens

Department of Chemistry, Kansas State University, 213 CBC Building, Manhattan, KS 66506

#### **Coordinates of the perturbations for the test cases**

- Case 1a: P1(0,0,4.5); P2 (0,0,-4.5)
- Case 1b: P1(-1.2287,-2.3450,-3.6388); P2 (1.2287,2.3450,3.6388)
- Case 2: P1(0,4.5,0); P2 (0,-4.5,0); P3(4.5,0,0); P4 (-4.5,0,0)
- Case 3: P1(0,4.5,0); P2 (0,-4.5,0); P3(4.5,0,0); P4 (-4.5,0,0); P5(0,0,4.5); P6 (0,0,-4.5)
- Case 4: P1(0,4.5,0); P2 (0,-4.5,0); P3(4.5,0,0); P4 (-4.5,0,0); P5(3.18198,3.18198,0); P6 (3.18198, -3.18198,0); P7(-3.18198,-3.18198,0); P8 (-3.18198, 3.18198,0)
- Case 5: P1(0,4.5,0); P2 (0,-4.5,0); P3(4.5,0,0); P4 (-4.5,0,0); P5(0,0,4.5); P6 (0,0,-4.5); P7(-3.18198,-3.18198,0); P8 (-3.18198, 3.18198,0); P9(3.18198,3.18198,0); P10 (3.18198, -3.18198,0); P11(0,3.18198,3.18198); P12 (0,3.18198, -3.18198); P13(0,-3.18198,-3.18198); P14(0,-3.18198, 3.18198); P15(3.18198,0,3.18198); P16 (3.18198,0, -3.18198); P17(-3.18198,0,-3.18198); P18(-3.18198,0,3.18198)

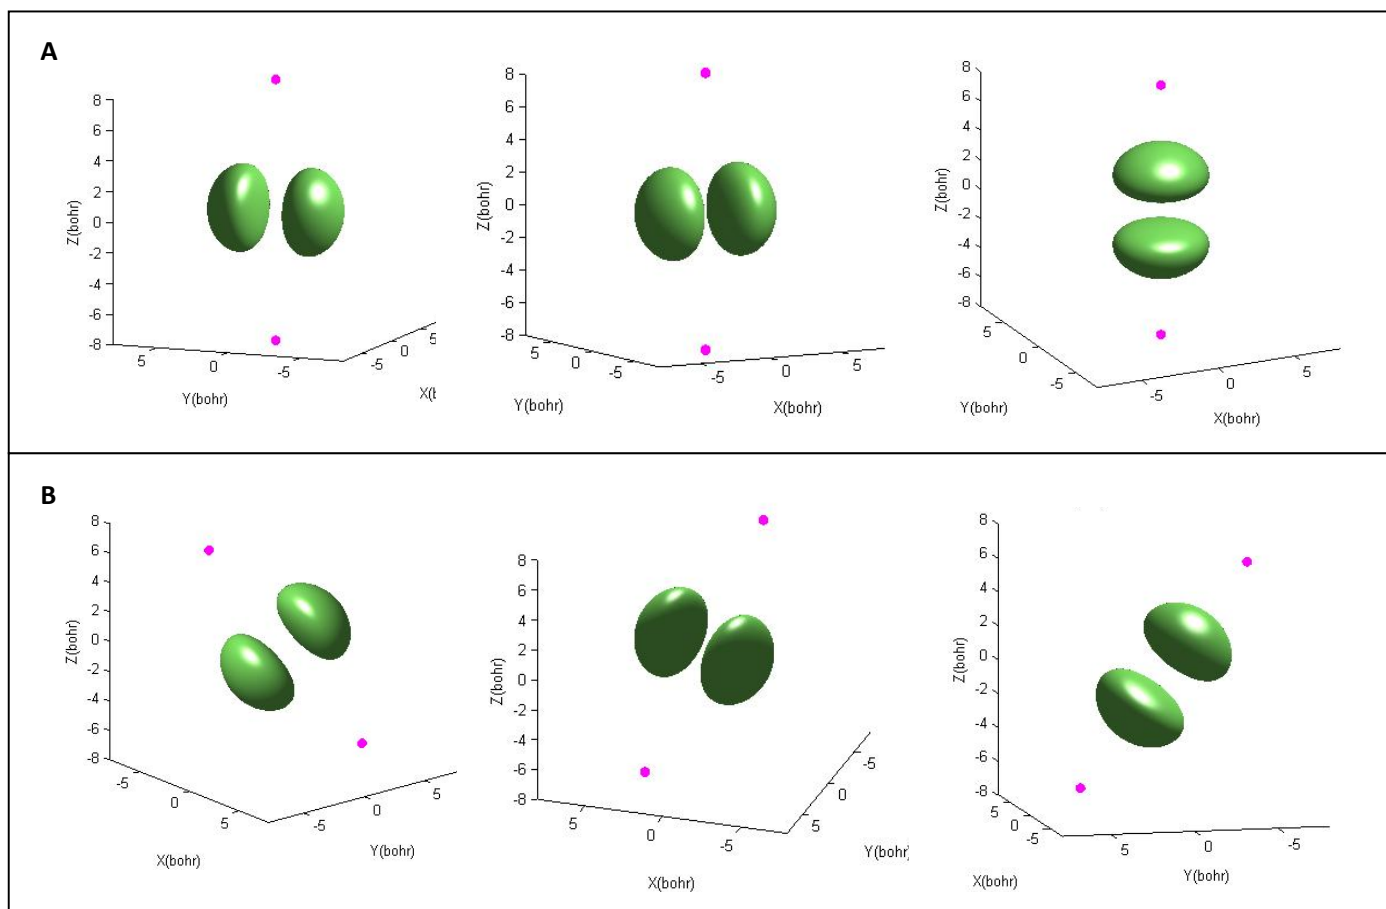

**Figure S1:** A) P orbitals of test case 1a and B) P orbitals of test case 1b. Green: Orbitals. Magenta: Point charge perturbations.
